# Supplementary material for: Familial and Parental Predictors of Physical Activity in Late Adolescence: Prospective Analysis over a Two-Year Period
Source: MDPI journal article supplement (doi:10.3390/healthcare9020132), 2021-01-29
Supplement: s1 [file s1]

Table S1

Differences between participants based on sufficiency/insufficiency of physical activity levels (PAL) at baseline

|                            | Baseline         |      |                |      | Mann Whitney/ $\chi^2$<br>(p) |
|----------------------------|------------------|------|----------------|------|-------------------------------|
|                            | Insufficient PAL |      | Sufficient PAL |      |                               |
|                            | F                | %    | F              | %    |                               |
| Gender $\chi^2$            |                  |      |                |      | 103.1 (0.001)                 |
| Males                      | 192              | 39.6 | 220            | 78.3 |                               |
| Females                    | 286              | 59.0 | 61             | 21.7 |                               |
| Missing                    | 7                | 1.4  | 0              | 0.0  |                               |
|                            |                  |      |                |      |                               |
| Socioeconomic status       |                  |      |                |      | 0.14 (0.88)                   |
| Below average              | 5                | 1.0  | 8              | 2.8  |                               |
| Average                    | 456              | 94.0 | 255            | 90.7 |                               |
| Above average              | 24               | 4.9  | 18             | 6.4  |                               |
| Missing                    | 0                | 0.0  | 0              | 0.0  |                               |
|                            |                  |      |                |      |                               |
| Paternal education         |                  |      |                |      | 4.18 (0.001)                  |
| Elementary school          | 40               | 8.2  | 13             | 4.6  |                               |
| High school                | 369              | 76.1 | 190            | 67.6 |                               |
| College level              | 42               | 8.7  | 43             | 15.3 |                               |
| University level           | 34               | 7.0  | 35             | 12.5 |                               |
| Missing                    | 0                | 0.0  | 0              | 0.0  |                               |
|                            |                  |      |                |      |                               |
| Maternal education         |                  |      |                |      | 2.15 (0.03)                   |
| Elementary school          | 149              | 30.7 | 65             | 23.1 |                               |
| High school                | 279              | 57.5 | 180            | 64.1 |                               |
| College level              | 26               | 5.4  | 18             | 6.4  |                               |
| University level           | 29               | 6.0  | 18             | 6.4  |                               |
| Missing                    | 2                | 0.4  | 0              | 0.0  |                               |
|                            |                  |      |                |      |                               |
| Parental/familial conflict |                  |      |                |      | 5.21 (0.001)                  |
| Almost never               | 161              | 33.2 | 142            | 50.5 |                               |
| Rarely                     | 198              | 40.8 | 98             | 34.9 |                               |
| From time to time          | 104              | 21.4 | 41             | 14.6 |                               |
| Often                      | 22               | 4.5  |                |      |                               |
| Missing                    | 0                | 0.0  | 0              | 0.0  |                               |
|                            |                  |      |                |      |                               |
| Parental absence           |                  |      |                |      | 0.68 (0.49)                   |
| Always at home             | 109              | 22.5 | 41             | 14.6 |                               |
| Rarely absent              | 104              | 21.4 | 82             | 29.2 |                               |
| Occasionally absent        | 168              | 34.6 | 105            | 37.4 |                               |

|                                   |     |      |     |      |               |
|-----------------------------------|-----|------|-----|------|---------------|
| Often absent                      | 102 | 21.0 | 53  | 18.9 |               |
| Missing                           | 2   | 0.4  | 0   | 0.0  |               |
|                                   |     |      |     |      |               |
| Parental care                     |     |      |     |      | 2.39 (0.02)   |
| Parents do not care at all        | 0   | 0.0  | 8   | 2.8  |               |
| Do not care                       | 12  | 2.5  | 8   | 2.8  |               |
| Good care                         | 159 | 32.8 | 105 | 37.4 |               |
| Very much care                    | 314 | 64.7 | 160 | 56.9 |               |
| Missing                           | 0   | 0.0  | 0   | 0.0  |               |
|                                   |     |      |     |      |               |
| Parental questioning              |     |      |     |      | 0.08 (0.92)   |
| Mostly never                      | 20  | 4.1  | 8   | 2.8  |               |
| Rarely                            | 60  | 12.4 | 38  | 13.5 |               |
| From time to time                 | 174 | 35.9 | 103 | 36.7 |               |
| Often/regularly                   | 229 | 47.2 | 132 | 47.0 |               |
| Missing                           | 2   | 0.4  | 0   | 0.0  |               |
|                                   |     |      |     |      |               |
| Sport participation <sup>χ²</sup> |     |      |     |      | 98.02 (0.001) |
| Yes, currently                    | 43  | 8.9  | 98  | 34.9 |               |
| Yes, but quit                     | 213 | 43.9 | 125 | 44.5 |               |
| No, never                         | 227 | 46.8 | 58  | 20.6 |               |
| Missing                           | 2   | 0.4  | 0   | 0.0  |               |

<sup>χ²</sup> indicates variables where differences between groups were calculated by  $\chi^2$  test

Table S2

Differences between participants based on sufficiency/insufficiency of physical activity levels (PAL) at first follow-up measurement

|                            | Baseline         |      |                |      | Mann Whitney/ $\chi^2$<br>(p) |
|----------------------------|------------------|------|----------------|------|-------------------------------|
|                            | Insufficient PAL |      | Sufficient PAL |      |                               |
|                            | F                | %    | F              | %    |                               |
| Gender $\chi^2$            |                  |      |                |      | 57.45 (0.01)                  |
| Males                      | 284              | 46.7 | 128            | 81.0 |                               |
| Females                    | 317              | 52.1 | 30             | 19.0 |                               |
| Missing                    | 7                | 1.2  | 0              | 0.0  |                               |
|                            |                  |      |                |      |                               |
| Socioeconomic status       |                  |      |                |      | 0.33 (0.73)                   |
| Below average              | 11               | 1.8  | 2              | 1.3  |                               |
| Average                    | 564              | 92.8 | 147            | 93.0 |                               |
| Above average              | 33               | 5.4  | 9              | 5.7  |                               |
| Missing                    | 0                | 0.0  | 0              | 0.0  |                               |
|                            |                  |      |                |      |                               |
| Paternal education         |                  |      |                |      | 1.20 (0.22)                   |
| Elementary school          | 42               | 6.9  | 11             | 7.0  |                               |
| High school                | 449              | 73.8 | 110            | 69.6 |                               |
| College level              | 71               | 11.7 | 14             | 8.9  |                               |
| University level           | 46               | 7.6  | 23             | 14.6 |                               |
| Missing                    | 0                | 0.0  | 0              | 0.0  |                               |
|                            |                  |      |                |      |                               |
| Maternal education         |                  |      |                |      | 1.63 (0.10)                   |
| Elementary school          | 180              | 29.6 | 34             | 21.5 |                               |
| High school                | 354              | 58.2 | 105            | 66.5 |                               |
| College level              | 32               | 5.3  | 12             | 7.6  |                               |
| University level           | 40               | 6.6  | 7              | 4.4  |                               |
| Missing                    | 2                | 0.3  | 0              | 0.0  |                               |
|                            |                  |      |                |      |                               |
| Parental/familial conflict |                  |      |                |      | 2.25 (0.02)                   |
| Almost never               | 230              | 37.8 | 73             | 46.2 |                               |
| Rarely                     | 237              | 39.0 | 59             | 37.3 |                               |
| From time to time          | 121              | 19.9 | 24             | 15.2 |                               |
| Often                      | 20               | 3.3  | 2              | 1.3  |                               |
| Missing                    | 0                | 0.0  | 0              | 0.0  |                               |
|                            |                  |      |                |      |                               |
| Parental absence           |                  |      |                |      | 0.49 (0.61)                   |
| Always at home             | 126              | 20.7 | 24             | 15.2 |                               |
| Rarely absent              | 143              | 23.5 | 43             | 27.2 |                               |
| Occasionally absent        | 206              | 33.9 | 67             | 42.4 |                               |

|                                   |     |      |    |      |                |
|-----------------------------------|-----|------|----|------|----------------|
| Often absent                      | 133 | 21.9 | 22 | 13.9 |                |
| Missing                           | 0   | 0.0  | 2  | 1.3  |                |
|                                   |     |      |    |      |                |
| Parental care                     |     |      |    |      | 1.21 (0.22)    |
| Parents do not care at all        | 4   | 0.7  | 4  | 2.5  |                |
| Do not care                       | 18  | 3.0  | 2  | 1.3  |                |
| Good care                         | 203 | 33.4 | 61 | 38.6 |                |
| Very much care                    | 383 | 63.0 | 91 | 57.6 |                |
| Missing                           | 0   | 0.0  | 0  | 0.0  |                |
|                                   |     |      |    |      |                |
| Parental questioning              |     |      |    |      | 1.02 (0.30)    |
| Mostly never                      | 24  | 3.9  | 4  | 2.5  |                |
| Rarely                            | 70  | 11.5 | 28 | 17.7 |                |
| From time to time                 | 221 | 36.3 | 56 | 35.4 |                |
| Often/regularly                   | 291 | 47.9 | 70 | 44.3 |                |
| Missing                           | 2   | 0.3  | 0  | 0.0  |                |
|                                   |     |      |    |      |                |
| Sport participation <sup>χ²</sup> |     |      |    |      | 103.94 (0.001) |
| Yes, currently                    | 70  | 11.5 | 71 | 44.9 |                |
| Yes, but quit                     | 274 | 45.1 | 64 | 40.5 |                |
| No, never                         | 262 | 43.1 | 23 | 14.6 |                |
| Missing                           | 2   | 0.3  | 0  | 0.0  |                |

<sup>χ²</sup> indicates variables where differences between groups were calculated by  $\chi^2$  test

Table S3

Differences between participants based on sufficiency/insufficiency of physical activity levels (PAL) at second follow-up measurement

|                            | Baseline         |      |                |      | Mann Whitney/ $\chi^2$<br>(p) |
|----------------------------|------------------|------|----------------|------|-------------------------------|
|                            | Insufficient PAL |      | Sufficient PAL |      |                               |
|                            | F                | %    | F              | %    |                               |
| Gender $\chi^2$            |                  |      |                |      | 74.74 (0.001)                 |
| Males                      | 260              | 45.2 | 152            | 79.6 |                               |
| Females                    | 313              | 54.4 | 34             | 17.8 |                               |
| Missing                    | 2                | 0.3  | 5              | 2.6  |                               |
|                            |                  |      |                |      |                               |
| Socioeconomic status       |                  |      |                |      | 0.67 (0.49)                   |
| Below average              | 7                | 1.2  | 6              | 3.1  |                               |
| Average                    | 537              | 93.4 | 174            | 91.1 |                               |
| Above average              | 31               | 5.4  | 11             | 5.8  |                               |
| Missing                    | 0                | 0.0  | 0              | 0.0  |                               |
|                            |                  |      |                |      |                               |
| Paternal education         |                  |      |                |      | 1.98 (0.09)                   |
| Elementary school          | 43               | 7.5  | 10             | 5.2  |                               |
| High school                | 425              | 73.9 | 134            | 70.2 |                               |
| College level              | 61               | 10.6 | 24             | 12.6 |                               |
| University level           | 46               | 8.0  | 23             | 12.0 |                               |
| Missing                    | 0                | 0.0  | 0              | 0.0  |                               |
|                            |                  |      |                |      |                               |
| Maternal education         |                  |      |                |      | 0.30 (0.70)                   |
| Elementary school          | 165              | 28.7 | 49             | 25.7 |                               |
| High school                | 337              | 58.6 | 122            | 63.9 |                               |
| College level              | 29               | 5.0  | 15             | 7.9  |                               |
| University level           | 42               | 7.3  | 5              | 2.6  |                               |
| Missing                    | 2                | 0.3  | 0              | 0.0  |                               |
|                            |                  |      |                |      |                               |
| Parental/familial conflict |                  |      |                |      | 4.34 (0.001)                  |
| Almost never               | 204              | 35.5 | 99             | 51.8 |                               |
| Rarely                     | 230              | 40.0 | 66             | 34.6 |                               |
| From time to time          | 121              | 21.0 | 24             | 12.6 |                               |
| Often                      | 20               | 3.5  | 2              | 1.0  |                               |
| Missing                    | 0                | 0.0  | 0              | 0.0  |                               |
|                            |                  |      |                |      |                               |
| Parental absence           |                  |      |                |      | 1.08 (0.27)                   |
| Always at home             | 119              | 20.7 | 31             | 16.2 |                               |
| Rarely absent              | 143              | 24.9 | 43             | 22.5 |                               |
| Occasionally absent        | 191              | 33.2 | 82             | 42.9 |                               |

|                              |     |      |     |      |               |
|------------------------------|-----|------|-----|------|---------------|
| Often absent                 | 120 | 20.9 | 35  | 18.3 |               |
| Missing                      | 2   | 0.3  | 0   | 0.0  |               |
|                              |     |      |     |      |               |
| Parental care                |     |      |     |      | 2.09 (0.04)   |
| Parents do not care at all   | 6   | 1.0  | 2   | 1.0  |               |
| Do not care                  | 16  | 2.8  | 4   | 2.1  |               |
| Good care                    | 184 | 32.0 | 80  | 41.9 |               |
| Very much care               | 369 | 64.2 | 105 | 55.0 |               |
| Missing                      | 0   | 0.0  | 0   | 0.0  |               |
|                              |     |      |     |      |               |
| Parental questioning         |     |      |     |      | 0.09 (0.92)   |
| Mostly never                 | 24  | 4.2  | 4   | 2.1  |               |
| Rarely                       | 71  | 12.3 | 27  | 14.1 |               |
| From time to time            | 205 | 35.7 | 72  | 37.7 |               |
| Often/regularly              | 273 | 47.5 | 88  | 46.1 |               |
| Missing                      | 2   | 0.3  | 0   | 0.0  |               |
|                              |     |      |     |      |               |
| Sport participation $\chi^2$ |     |      |     |      | 89.85 (0.001) |
| Yes, currently               | 65  | 11.3 | 76  | 39.8 |               |
| Yes, but quit                | 259 | 45.0 | 79  | 41.4 |               |
| No, never                    | 251 | 43.7 | 34  | 17.8 |               |
| Missing                      | 0   | 0.0  | 2   | 1.0  |               |

$\chi^2$  indicates variables where differences between groups were calculated by  $\chi^2$  test
